# Supplementary material for: Relationship between mortality and health care expenditure: Sustainable assessment of health care system
Source: PubMed Central journal article supplement (PMC7904168; doi:10.1371/journal.pone.0247413), 2021-02-24

## APPENDICIES

### S1 Appendix. Study Countries.

|                        |                           |               |                 |
|------------------------|---------------------------|---------------|-----------------|
| <b>A</b>               | Canada                    | <b>F</b>      | Japan           |
| Afghanistan            | Central African Republic  | Fiji          | Jordan          |
| Albania                | Chad                      | Finland       |                 |
| Algeria                | Chile                     | France        | <b>K</b>        |
| Angola                 | China                     |               | Kazakhstan      |
| Argentina              | Colombia                  | <b>G</b>      | Kenya           |
| Armenia                | Comoros                   | Gabon         | Kiribati        |
| Australia              | Congo                     | Georgia       | Korea           |
| Austria                | Costa Rica                | Germany       | Kuwait          |
| Azerbaijan             | Côte d'Ivoire             | Ghana         | Kyrgyz Republic |
|                        | Croatia                   | Greece        |                 |
| <b>B</b>               | Cuba                      | Grenada       | <b>L</b>        |
| Bahrain                | Cyprus                    | Guatemala     | Lao PDR         |
| Bangladesh             | Czech Republic            | Guinea        | Latvia          |
| Barbados               |                           | Guinea-Bissau | Lebanon         |
| Belarus                | <b>D</b>                  | Guyana        | Lesotho         |
| Belgium                | Democratic Republic Congo |               | Liberia         |
| Belize                 | Denmark                   | <b>H</b>      | Libya           |
| Benin                  | Djibouti                  | Haiti         | Lithuania       |
| Bhutan                 | Dominican Republic        | Honduras      | Luxembourg      |
| Bolivia                |                           | Hungary       |                 |
| Bosnia and Herzegovina | <b>E</b>                  | <b>I</b>      | <b>M</b>        |
| Botswana               | Ecuador                   | Iceland       | Madagascar      |
| Brazil                 | Egypt                     | India         | Malawi          |
| Brunei                 | El Salvador               | Indonesia     | Malaysia        |
| Bulgaria               | Equatorial Guinea         | Iran          | Maldives        |
| Burkina Faso           | Eritrea                   | Iraq          | Mali            |
| Burundi                | Estonia                   | Ireland       | Malta           |
|                        | Eswatini                  | Israel        | Mauritania      |
| <b>C</b>               | Ethiopia                  | Italy         | Mauritius       |
| Cabo Verde             |                           |               | Mexico          |
| Cambodia               |                           | <b>J</b>      | Micronesia      |
| Cameroon               |                           | Jamaica       | Moldova         |
|                        |                           |               | Mongolia        |

|                  |                                |                      |
|------------------|--------------------------------|----------------------|
| Montenegro       | Russia                         | Togo                 |
| Morocco          | Rwanda                         | Tonga                |
| Mozambique       |                                | Trinidad and Tobago  |
| Myanmar          | <b>S</b>                       | Tunisia              |
|                  | Samoa                          | Turkey               |
| <b>N</b>         | São Tomé and Príncipe          | Turkmenistan         |
| Namibia          | Saudi Arabia                   |                      |
| Nepal            | Senegal                        | <b>U</b>             |
| Netherlands      | Serbia                         | Uganda               |
| New Zealand      | Sierra Leone                   | Ukraine              |
| Nicaragua        | Singapore                      | United Arab Emirates |
| Niger            | Slovak Republic                | United Kingdom       |
| Nigeria          | Slovenia                       | United States        |
| North Macedonia  | Solomon Islands                | Uruguay              |
| Norway           | South Africa                   | Uzbekistan           |
|                  | Spain                          |                      |
| <b>O</b>         | Sri Lanka                      |                      |
| Oman             | St. Lucia                      | <b>V</b>             |
|                  | St. Vincent and the Grenadines | Vanuatu              |
| <b>P</b>         | Sudan                          | Venezuela            |
| Pakistan         | Suriname                       | Vietnam              |
| Panama           | Sweden                         | Yemen                |
| Papua New Guinea | Switzerland                    |                      |
| Paraguay         | Syrian Arab Republic           | <b>Z</b>             |
| Peru             |                                | Zambia               |
| Philippines      |                                |                      |
| Poland           |                                |                      |
| Portugal         | <b>T</b>                       |                      |
|                  | Tajikistan                     |                      |
| <b>Q</b>         | Tanzania                       |                      |
| Qatar            | Thailand                       |                      |
|                  | The Bahamas                    |                      |
| <b>R</b>         | The Gambia                     |                      |
| Romania          | Timor-Leste                    |                      |

Note: Selection based on data availability and countries with no missing data.

**S2 Appendix. Descriptive statistics of the 177 countries.**

| Statistics  | IMR     | lnIMR   | CHE     | lnCHE   | MMR      | lnMMR   |
|-------------|---------|---------|---------|---------|----------|---------|
| Mean        | 30.6526 | 2.9308  | 6.0909  | 1.7184  | 206.9209 | 4.2167  |
| Median      | 19.75   | 2.9832  | 5.7443  | 1.7482  | 62.00    | 4.1271  |
| Maximum     | 142.00  | 4.9558  | 20.4146 | 3.0163  | 2650.00  | 7.8823  |
| Minimum     | 1.70    | 0.5306  | 1.0250  | 0.0247  | 3.00     | 1.0986  |
| Std. Dev.   | 27.8432 | 1.0755  | 2.4921  | 0.4351  | 291.7327 | 1.6521  |
| Skewness    | 1.0802  | -0.2317 | 0.7102  | -0.4806 | 2.3117   | -0.0076 |
| Kurtosis    | 3.3592  | 1.9486  | 3.9102  | 3.1905  | 11.2755  | 1.8434  |
| Jarque-Bera | 563.184 | 154.996 | 334.145 | 112.747 | 10551.16 | 157.102 |
| Probability | <0.0001 | <0.0001 | <0.0001 | <0.0001 | <0.0001  | <0.0001 |

**S3 Appendix. Panel unit root tests.**

| Variables | Level  |         | First-difference |           |
|-----------|--------|---------|------------------|-----------|
|           | Fisher | IPS     | Fisher           | IPS       |
| lnCHE     | 0.6707 | -1.1008 | -9.6011*         | -21.6950* |
| lnMMR     | 1.7899 | -       | -29.7252*        | -         |
| lnIMR     | 6.3858 | 17.1666 | -1.3830***       | -1.7446** |

Note: \*, \*\*, \*\*\* represent 1% , 5% and 10% significance level

**S4 Appendix. Modified Wald test for groupwise heteroskedasticity in fixed-effect regression model**

| Results            | lnIMR    | lnMMR    |
|--------------------|----------|----------|
| lnCHE              | -0.2973* | -0.1286* |
|                    | [0.0241] | [0.0238] |
| _cons              | 3.4417*  | 4.4377*  |
|                    | [0.0416] | [0.0411] |
| sigma_u            | 1.0194   | 1.6281   |
| sigma_e            | 0.1922   | 0.1945   |
| rho                | 0.9657   | 0.9859   |
| Obs                | 2,818    | 2,818    |
| Groups             | 177      | 177      |
| <i>Diagnostics</i> |          |          |
| Prob > F           | <0.0001* | <0.0001* |
| $R^2$              | 0.13     | 0.10     |
| $\chi^2$           | 2.1e+05  | 8.5e+05  |
| Prob > $\chi^2$    | <0.0001* | <0.0001* |

Note: \*, \*\*, \*\*\* represent 1% , 5% and 10% significance level

## S5 Appendix. Quantile Process Estimation.

5<sup>th</sup> mmr

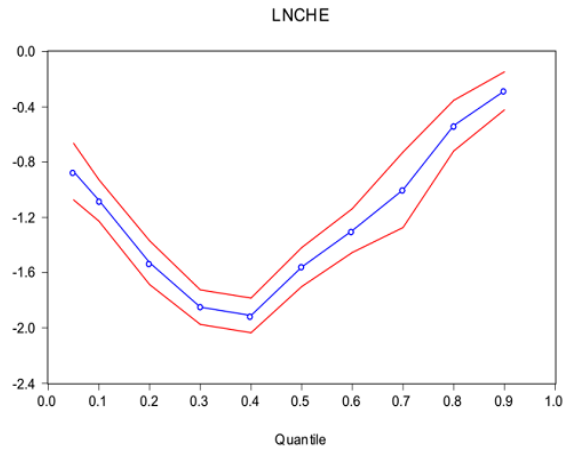

95<sup>th</sup> mmr

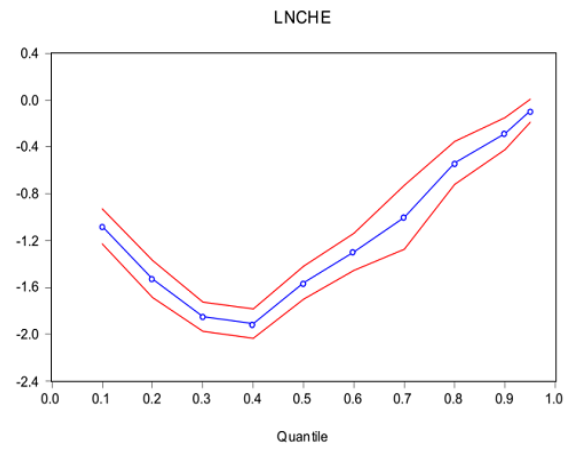

5<sup>th</sup> imr

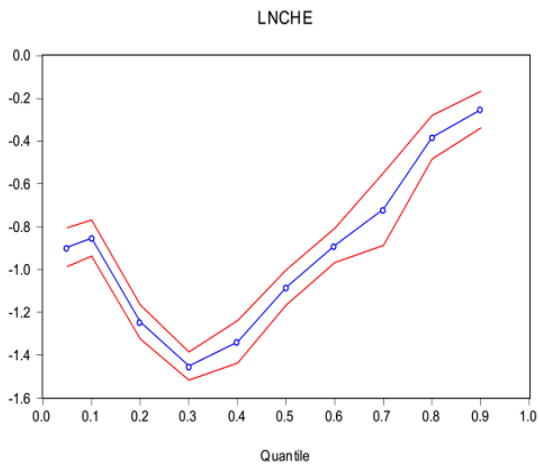

95<sup>th</sup> imr

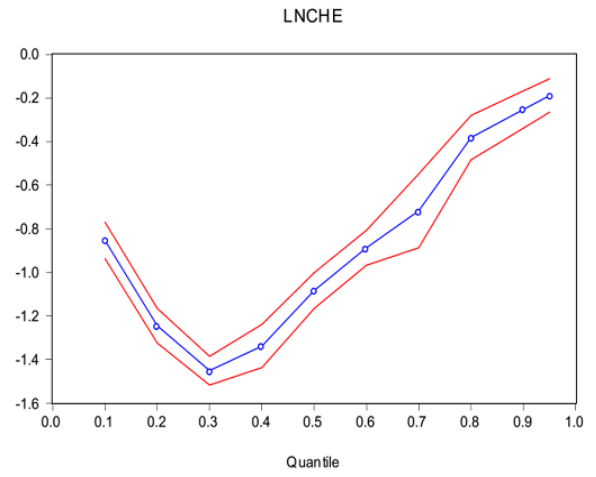

Supplement: pone.0247413.s001.pdf [file pone.0247413.s001.pdf]
